# Supplementary figures and images for: Nano-caged shikimate as a multi-site cross-linker of collagen for biomedical applications
Source: Royal Society of Chemistry journal article supplement (doi:10.1039/c5ra02278a), 2015-01-01

Supplementary Figure 1

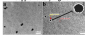

Supplement: c5ra02278a2.pdf [file c5ra02278a2.pdf]
